# Supplementary material
Source: MDPI journal article supplement (https://www.mdpi.com/2674-1024/3/1/3)
Supplement: s1 [file s1]

Supplementary material

Physical Conditions that Limit Chickpea Root Growth and Emergence on Heavy-Textured Soil

Wendy H.Vance<sup>1\*</sup>, Richard W. Bell<sup>1</sup> and Chris Johansen<sup>2</sup>

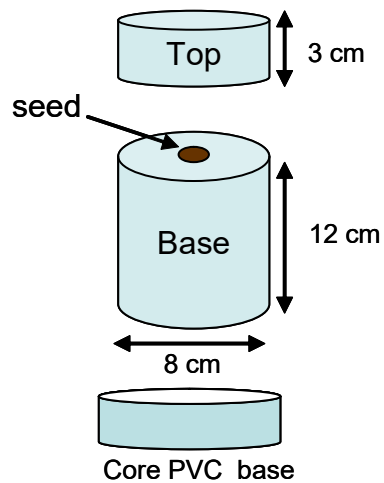

Figure S1. Pot construction to ensure consistent soil physical properties below and above the chickpea seed in Experiments 1 and 2.

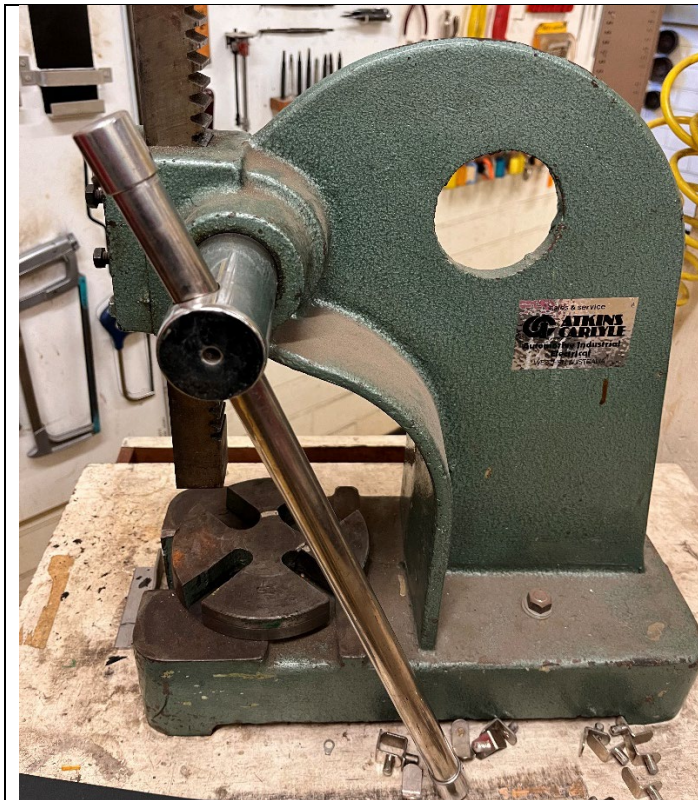

a) Bench-mounted hand press

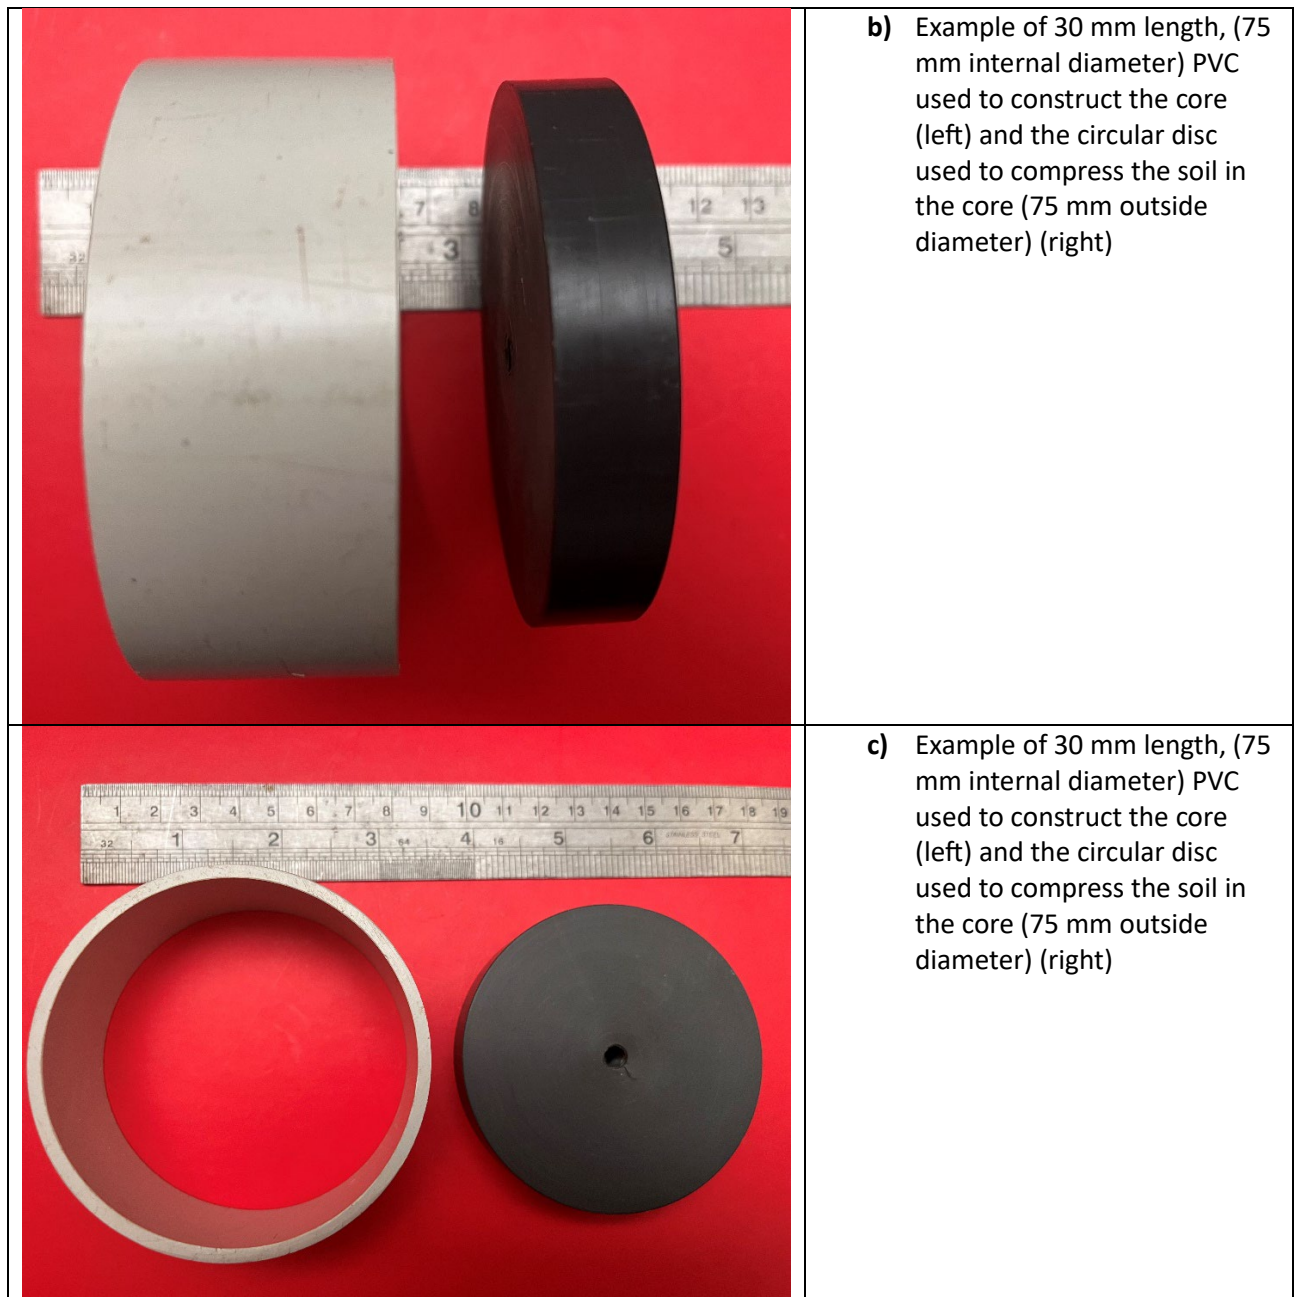

**Figure S2. Bench mounted hand press (a), PVC pipe (b), and circular disc (c) used to construct the cores in Experiments 1 and 2.**
